# Supplementary material for: A population genetic analysis of the Critically Endangered Madagascar big-headed turtle, Erymnochelys madagascariensis across captive and wild populations
Source: Springer Nature journal article supplement (doi:10.1038/s41598-022-12422-y), 2022-05-24
Supplement: MOESM1 [file 41598_2022_12422_MOESM1_ESM.pdf]

## Supplementary Information: A Population Genetic Analysis of the Critically Endangered Madagascar big-headed turtle, *Erymnochelys madagascariensis* across Captive and Wild Populations

Nina F. D. White<sup>1,2</sup>, Holly Mennell<sup>1</sup>, Georgia Power<sup>1</sup>, Dominic Edwards<sup>1</sup>, Luke Chrimes<sup>1</sup>, Lance Woolaver<sup>3,4</sup>, Juliette Veloso<sup>3</sup>, Randriamahita<sup>3</sup>, Richard Mozavelo<sup>3</sup>, Tsilavo Hasina Rafeliasoa<sup>3,5</sup>, Gerald Kuchling<sup>6</sup>, Javier Lopez<sup>7</sup>, Ernest Bekarany<sup>3</sup>, Namotoa Charles<sup>3</sup>, Richard Young<sup>3</sup>, Richard Lewis<sup>3</sup>, Michael W. Bruford<sup>1</sup>, Pablo Orozco-terWengel<sup>1\*</sup>

\* Corresponding author

1 = School of Biosciences, Cardiff University

2 = Institute of Zoology, Zoological Society of London

3 = Durrell Wildlife Conservation Trust

4 = Wildlife Preservation Canada

5 = Biodiversity Conservation Madagascar

6 = School of Biological Sciences, University of Western Australia

7 = Animal Health Department, Chester Zoo

**Table S1:** Microsatellite Primers. All primers were originally designed by Rafeliasoa *et al.* (2006). All information in this table is taken from Rafeliasoa *et al.* (2006), with the exception labels and annealing temperatures (Ta), which were re-optimised by this study. \*Complex:  
(TC)<sub>8</sub>(AC)<sub>7</sub>AAAA(TC)<sub>8</sub>(AC)<sub>8</sub>AATT(TC)<sub>9</sub>TT(TC)<sub>8</sub>(AC)<sub>11</sub>

| Primer Name | Forward and Reverse Primer Sequence (5'-3')                 | Fragment Size (bp) | Repeat Unit                                                   | Label | Ta (°C) |
|-------------|-------------------------------------------------------------|--------------------|---------------------------------------------------------------|-------|---------|
| 131         | F: AAGTTCAGACTGGGCAGGG<br>R: CCACCTTCAGACACACTCAC           | 204–220            | (CA) <sub>12</sub>                                            | Fam   |         |
| 327         | F: ACACAGGGTCCATCCACTTC<br>R: TCAGCAAACAAGCAACGAG           | 308–316            | Complex*                                                      | Hex   | 60      |
| 699         | F: CCAGGACATCTTAGACTACTGTTCC<br>R: CACTATTTAGGCTTTTCATTCTGC | 225–229            | (GT) <sub>9</sub>                                             | Tam   |         |
| 777         | F: GAAAAAAAAAGGGGTGGGG<br>R: AGGGAGTTAGGGTTGTAGGAG          | 134–148            | (CA) <sub>20</sub>                                            | Hex   |         |
| 196         | F: AGGATTCAAACAGTGGAGTGC<br>R: CCCAGACAATGACTAACAAACC       | 196–220            | (GT) <sub>21</sub>                                            | Tam   | 64      |
| 234         | F: CCCCCACGAAATCTCATGC<br>R: TGTAAGATGCTGGCAAAGTG           | 231–235            | (CTTT) <sub>5</sub>                                           | Hex   |         |
| 897         | F: TGTGTGGAGAGGGATGGTTC<br>R: GTATGCTTAACCCCCACCTC          | 147–159            | (GT) <sub>13</sub>                                            | Fam   |         |
| 499         | F: GTGAGCCCCCAAATSCCC<br>R: TGCTGGACAATAATCTTTCTATC         | 187–205            | (CA) <sub>9</sub> GA(CA) <sub>3</sub><br>GC(CA) <sub>14</sub> | Tam   | 62      |

**Table S2:** Priors and hyperpriors used in Msvar analysis.  $N_0$  = current effective population size,  $N_t$  = ancestral population size,  $t$  = time of bottleneck,  $m$  = mutation rate. M = mean, V = variance. All values are log10.

| Combination  | Run | Priors     |            |            |            |          |          |          |          | Hyperpriors |            |            |            |          |          |       |       |
|--------------|-----|------------|------------|------------|------------|----------|----------|----------|----------|-------------|------------|------------|------------|----------|----------|-------|-------|
|              |     | $N_0$<br>M | $N_0$<br>V | $N_t$<br>M | $N_t$<br>V | $t$<br>M | $t$<br>V | $m$<br>M | $m$<br>V | $N_0$<br>M  | $N_0$<br>V | $N_t$<br>M | $N_t$<br>V | $t$<br>M | $t$<br>V | $m$ M | $m$ V |
| 1<br>(2,4,9) | 1   | 4          | 1          | 4          | 1          | 5        | 1        | -3.5     | 1        | 4           | 1          | 4          | 1          | 5        | 1        | -3.5  | 0.25  |
|              | 2   | 3          | 1          | 4          | 1          | 4        | 1        | -3.5     | 1        | 3           | 1          | 4          | 1          | 4        | 1        | -3.5  | 0.25  |
|              | 3   | 5          | 1          | 4          | 1          | 4        | 1        | -3.5     | 1        | 5           | 1          | 4          | 1          | 4        | 1        | -3.5  | 0.25  |
| 2<br>(3,5,8) | 1   | 5          | 1          | 5          | 1          | 4        | 1        | -3       | 1        | 5           | 1          | 5          | 1          | 4        | 1        | -3    | 0.25  |
|              | 2   | 3          | 1          | 5          | 1          | 4        | 1        | -3       | 1        | 3           | 1          | 5          | 1          | 4        | 1        | -3    | 0.25  |
|              | 3   | 5          | 1          | 3          | 1          | 3        | 1        | -3       | 1        | 5           | 1          | 3          | 1          | 3        | 1        | -3    | 0.25  |
| 3<br>(3,6,7) | 1   | 5          | 1          | 4          | 1          | 4        | 1        | -3       | 1        | 5           | 1          | 5          | 1          | 4        | 1        | -3    | 0.25  |
|              | 2   | 3          | 1          | 5          | 1          | 5        | 1        | -3       | 1        | 3           | 1          | 5          | 1          | 5        | 1        | -3    | 0.25  |
|              | 3   | 5          | 1          | 3          | 1          | 3        | 1        | -3       | 1        | 5           | 1          | 3          | 1          | 4        | 1        | -3    | 0.25  |

**Table S3:** Mode and 95% highest posterior density intervals for parameters used in MSVar.  $N_0$  = current effective population size,  $N_t$  = ancestral population size,  $\mu$  = mutation rate,  $t$  = time of bottleneck. Values are log10.

| Population     | Run | $N_0$ |           | $N_t$ |           | $\mu$ |                | $t$  |           |
|----------------|-----|-------|-----------|-------|-----------|-------|----------------|------|-----------|
|                |     | Mode  | HPD       | Mode  | HPD       | Mode  | HPD            | Mode | HPD       |
| Ankomakoma     | 2   | 2.25  | 1.32-2.93 | 4.75  | 4.05-5.47 | -3.68 | -4.09 -- -3.18 | 4.25 | 3.33-4.90 |
|                | 4   | 1.65  | 1.00-2.48 | 4.65  | 3.95-5.29 | -3.55 | -4.01 -- -3.09 | 3.75 | 3.04-4.42 |
|                | 9   | 2.05  | 1.43-2.85 | 4.75  | 4.08-5.44 | -3.65 | -4.09 -- -3.18 | 4.05 | 3.40-4.81 |
| Ankorovoka     | 2   | 2.35  | 1.47-3.27 | 4.75  | 3.98-5.42 | -3.65 | -4.07 -- -3.15 | 4.15 | 3.27-5.07 |
|                | 4   | 2.05  | 1.17-2.97 | 4.65  | 3.92-5.35 | -3.55 | -3.97 -- -3.06 | 3.85 | 3.01-4.73 |
|                | 9   | 2.45  | 1.41-3.14 | 4.75  | 4.07-5.48 | -3.55 | -4.07 -- -3.15 | 4.35 | 3.28-4.97 |
| Antsilomba     | 2   | 2.35  | 1.16-2.90 | 5.05  | 4.27-5.62 | -3.55 | -4.07 -- -3.17 | 4.05 | 3.02-4.70 |
|                | 4   | 1.65  | 0.91-2.58 | 4.85  | 4.17-5.60 | -3.55 | -4.02 -- -3.10 | 3.55 | 2.78-4.34 |
|                | 9   | 1.45  | 0.73-2.63 | 5.05  | 4.38-5.67 | -3.63 | -4.15 -- -3.23 | 3.35 | 2.64-4.50 |
| Sariaka        | 3   | 1.55  | 0.77-2.43 | 4.75  | 4.07-5.39 | -3.28 | -3.69 -- -2.79 | 3.75 | 2.95-4.58 |
|                | 5   | 1.35  | 0.69-2.24 | 4.65  | 3.95-5.23 | -3.15 | -3.60 -- -2.68 | 3.85 | 2.97-4.45 |
|                | 8   | 1.45  | 0.58-2.13 | 4.45  | 3.74-5.09 | -3.15 | -3.54 -- -2.64 | 3.55 | 2.75-4.32 |
| Ampijoroa      | 3   | 1.75  | 0.96-2.43 | 4.65  | 4.04-5.23 | -3.25 | -3.72 -- -2.81 | 3.55 | 2.98-4.36 |
|                | 5   | 1.45  | 0.82-2.18 | 4.55  | 3.91-5.19 | -3.15 | -3.61 -- -2.71 | 3.45 | 2.84-4.16 |
|                | 8   | 1.75  | 0.74-2.36 | 4.35  | 3.75-4.98 | -3.05 | -3.56 -- -2.65 | 3.55 | 2.71-4.22 |
| Ambondrobe     | 3   | 1.55  | 0.60-2.35 | 4.75  | 4.16-5.38 | -3.25 | -3.73 -- -2.81 | 3.45 | 2.61-4.22 |
|                | 6   | 1.65  | 1.07-2.19 | 4.75  | 4.14-5.39 | -3.15 | -3.64 -- -2.73 | 3.65 | 3.01-4.19 |
|                | 7   | 1.55  | 0.95-2.37 | 4.55  | 3.91-5.16 | -3.15 | -3.59 -- -2.69 | 3.55 | 2.89-4.28 |
| Andranomiditra | 3   | 1.65  | 0.99-2.42 | 4.55  | 3.90-5.21 | -3.25 | -3.70 -- -2.79 | 3.85 | 2.99-4.49 |
|                | 6   | 1.65  | 0.48-2.32 | 4.45  | 3.88-5.14 | -3.25 | -3.68 -- -2.76 | 3.65 | 2.68-4.39 |
|                | 7   | 1.55  | 0.75-2.30 | 4.35  | 3.71-4.92 | -3.15 | -3.61 -- -2.69 | 3.65 | 2.83-4.29 |
| <b>Average</b> |     | 1.77  | 0.85-2.33 | 4.67  | 3.73-4.95 | -3.36 | -3.53 -- -2.68 | 3.75 | 2.74-4.17 |

**Table S4:** Analysis of Molecular Variance (AMOVA) results, showing the partition of genetic variation between microsatellite genetic clusters, sampling locations, and individuals. Mitochondrial genetic variation at the cytochrome oxidase I gene (COI) between phylogenetic clade, sampling location, and individuals, and at the cytochrome b (Cyt B) between phylogenetic clade, sampling location, and individuals. D.f. = degrees of freedom.

| <b>Microsatellites</b>          |      |                |                     |                         |
|---------------------------------|------|----------------|---------------------|-------------------------|
| Source of variation             | d.f. | Sum of squares | Variance components | Percentage of variation |
| Among groups                    | 5    | 385            | 0.43                | 14                      |
| Among populations within groups | 17   | 83             | 0.19                | 6                       |
| Within populations              | 861  | 2200           | 2.55                | 81                      |
| Total                           | 883  | 2667           | 3.17                |                         |

  

| <b>COI</b>                      |      |                |                     |                         |
|---------------------------------|------|----------------|---------------------|-------------------------|
| Source of variation             | d.f. | Sum of squares | Variance components | Percentage of variation |
| Among groups                    | 1    | 102.44         | 10.63               | 95.27                   |
| Among populations within groups | 3    | 3.79           | 0.039               | 0.35                    |
| Within populations              | 109  | 53.38          | 0.5                 | 4.39                    |
| Total                           | 113  | 159.61         | 11.16               |                         |

  

| <b>CYT B</b>                    |      |                |                     |                         |
|---------------------------------|------|----------------|---------------------|-------------------------|
| Source of variation             | d.f. | Sum of squares | Variance components | Percentage of variation |
| Among groups                    | 2    | 288.5          | 8.82                | 92.88                   |
| Among populations within groups | 12   | 8.36           | 0.01                | 0.1                     |
| Within populations              | 41   | 27.38          | 0.67                | 7.03                    |
| Total                           | 55   | 324.23         | 9.5                 |                         |

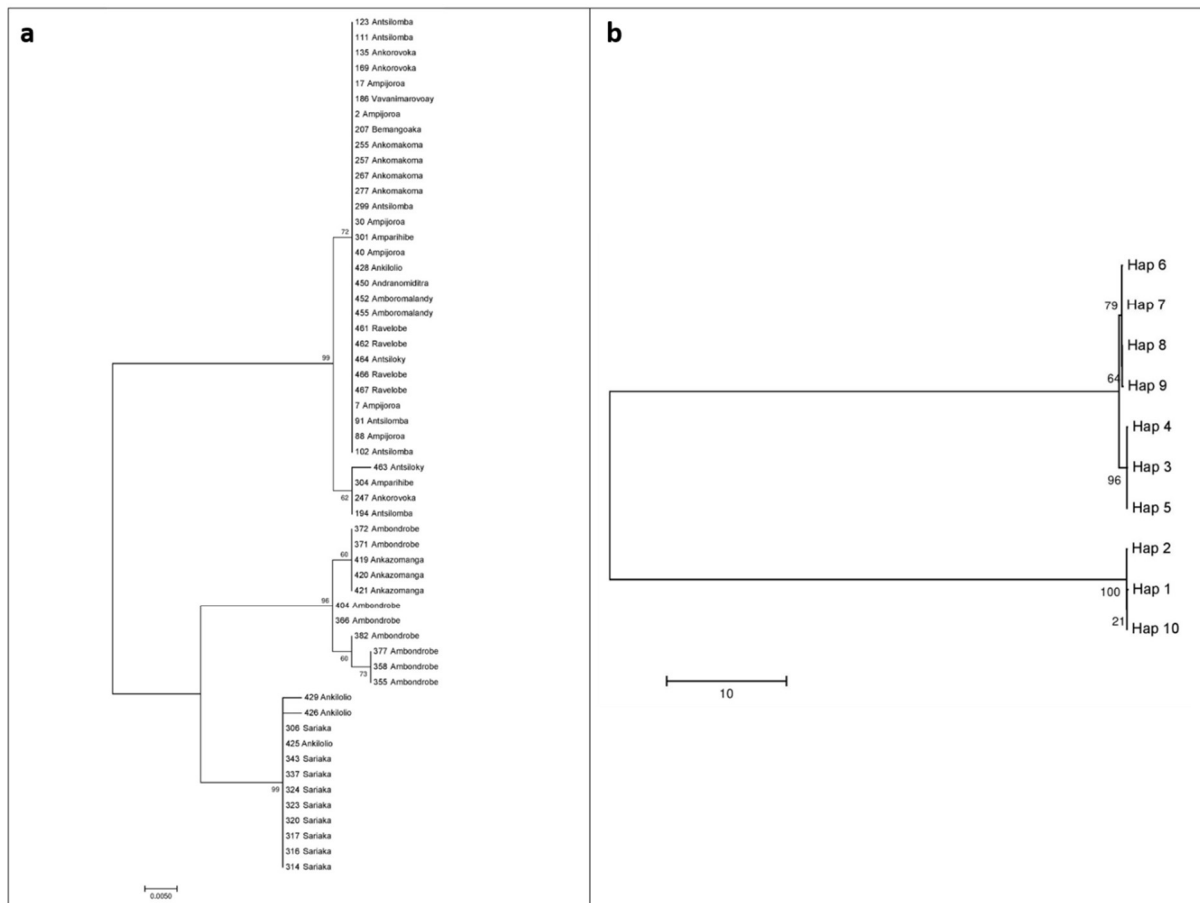

**Figure S1:** Maximum likelihood trees for cytochrome b data according to a) sampling location and b) haplotype

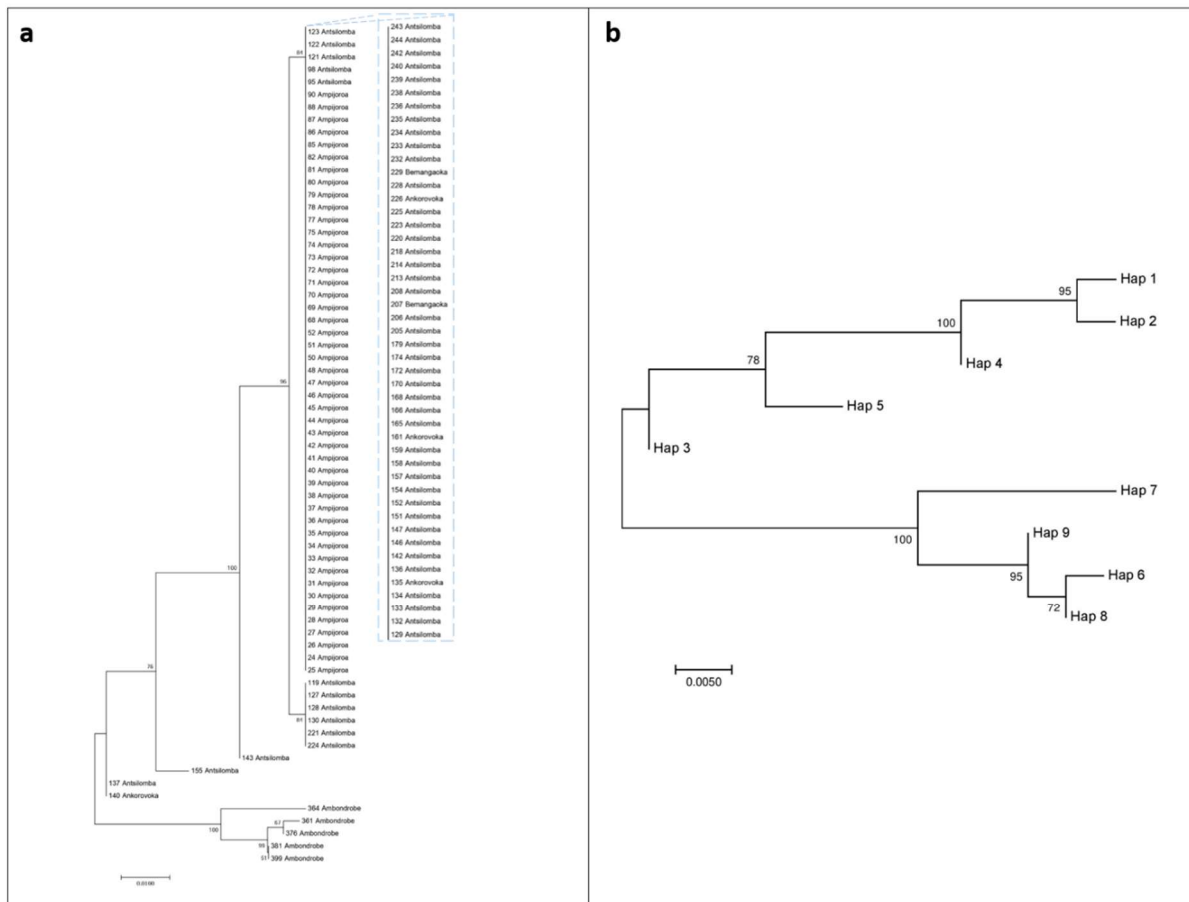

**Figure S2:** Maximum likelihood trees for cytochrome oxidase I data according to a) sampling location and b) haplotypes. N.B. in panel ‘a’ the clade containing individuals from Ampijoroa and Antsilomba has had its top half moved to the side of the tree, to enable the figure to be displayed legibly. The moved half is displayed within a blue dashed box, with dashed lines indicating its original position in the tree.
